# Supplementary material for: Mena–GRASP65 interaction couples actin polymerization to Golgi ribbon linking
Source: PubMed Central journal article supplement — Mol Biol Cell. 2016 Jan 1;27(1):137–52. doi: 10.1091/mbc.E15-09-0650 (PMC4694753; doi:10.1091/mbc.e15-09-0650), 2016-01-01
Supplement: supp_E15-09-0650v1_CombinedSupMats.pdf [file supp_E15-09-0650v1_CombinedSupMats.pdf]

# Supplemental Materials

*Molecular Biology of the Cell*

Tang et al.

## **Mena-GRASP65 interaction couples actin polymerization to Golgi ribbon linking**

### **Supplemental Materials**

Online supplemental materials include 5 Supplementary Figures and 1 Supplementary Table. Figure S1 shows the biochemical properties of the cytosolic factors that enhance GRASP65 oligomerization.

Figure S2 shows Biochemical enrichment of cytosolic proteins that enhance GRASP65 beads aggregation. Figure S3 shows that Mena depletion does not impact VSV-G transport. Figure S4 shows that actin filaments are required for Golgi ribbon linking but not for Golgi stacking. Figure S5 shows that depolymerization of F-actin inhibits Golgi reassembly after nocodazole washout. Table S1 shows the identification of Mena and actin as GRASP65-interacting proteins by mass spectrometry.

**Figure S1**

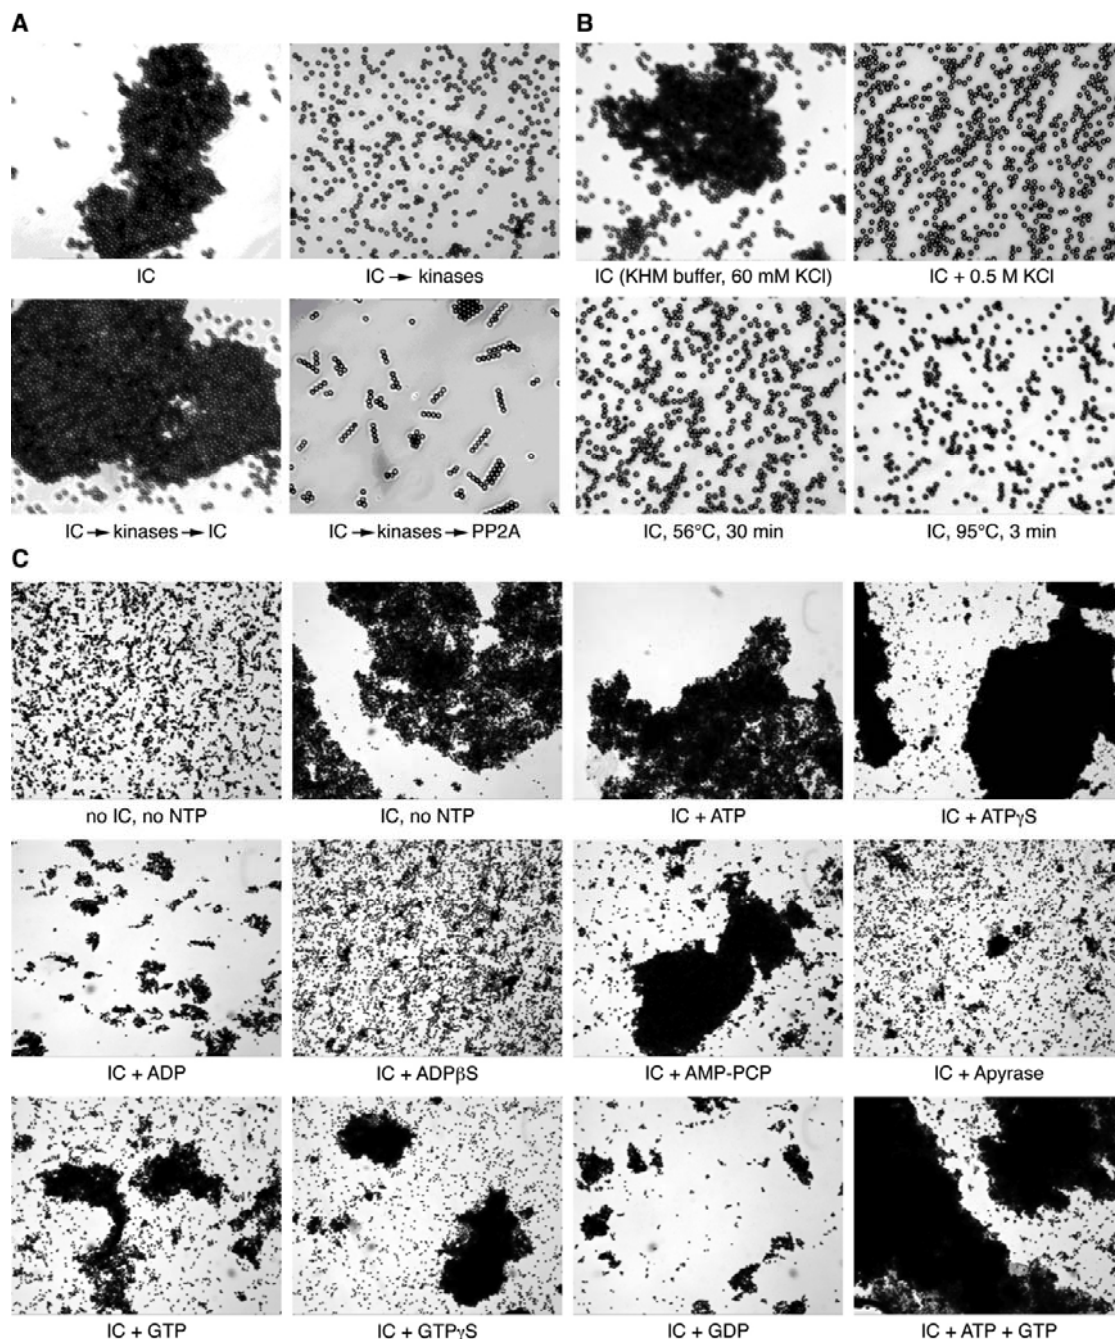

**Figure S1. Biochemical properties of the cytosolic factors that enhance GRASP65 oligomerization.**

(A) GRASP65 coupled beads incubated with interphase cytosol (IC), re-isolated and treated with mitotic kinases (IC → kinases), followed by incubation with either interphase cytosol (IC → kinases → IC) or PP2A (IC → kinases → PP2A). Shown are microscopy images of the beads. (B) GRASP65 coupled beads incubated with interphase cytosol that was pre-treated by adding 0.5 M NaCl or by heat (56°C for 30 min or 95°C for 3 min). Note both high salt and heat treatment abolished the activity of interphase cytosol. (C) GRASP65 coupled beads incubated under the indicated conditions, with or without interphase cytosol, plus ATP, GTP or their analogs (2 mM), or apyrase (0.02 U/μl) as indicated.

**Figure S2**

**A** IC sequential ammonium sulfate precipitation (ASP, %)

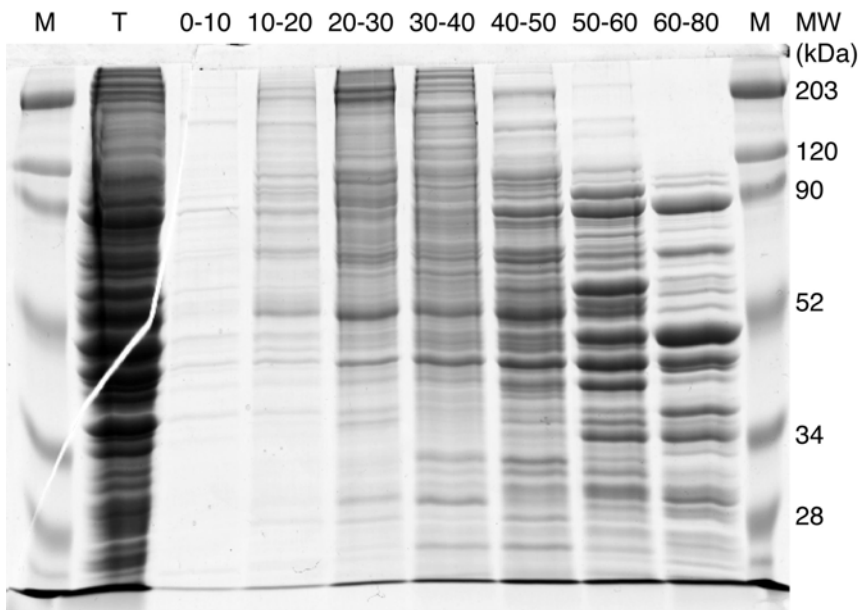

| %ASP  | Activity |
|-------|----------|
| Total | ++++     |
| 0-10  | +        |
| 10-20 | +++      |
| 20-30 | ++++     |
| 30-40 | ++       |
| 40-50 | +        |
| 50-60 | +/-      |
| 60-80 | -        |

**B** IC 15-30% ASP → 10-35% glycerol gradient

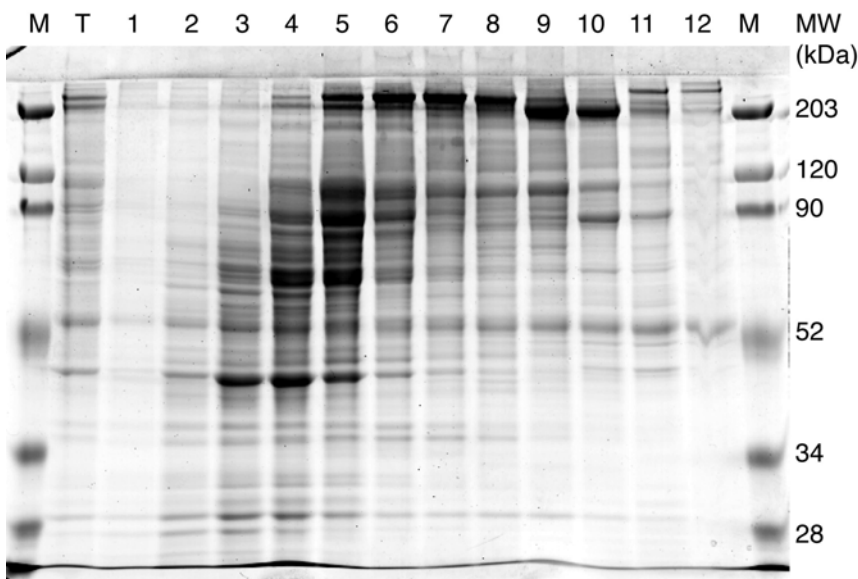

| Fraction | Activity |
|----------|----------|
| Total    | +++      |
| 1        | +        |
| 2        | +        |
| 3        | +/-      |
| 4        | +/-      |
| 5        | +/-      |
| 6        | +++      |
| 7        | ++       |
| 8        | ++       |
| 9        | ++++     |
| 10       | ++       |
| 11       | +        |
| 12       | +        |

**Figure S2. Enrichment of cytosolic proteins that enhance GRASP65 beads aggregation.**

(A) Proteins from interphase cytosol were fractionated by sequential ammonium sulfate precipitation. Proteins that precipitated at indicated ammonium sulfate cut were dissolved and dialyzed into KHM buffer, analyzed by SDS-PAGE and Coomassie blue staining (left panel) and tested for activity in the GRASP65 bead aggregation assay (results summarized in the right panel). (B) Cytosolic protein that were precipitated by 15-30% ammonium sulfate cut were dissolved, dialyzed, and further separated by a 10-35% glycerol gradient. The gradient was fractionated from top to the bottom into 12 fractions. Proteins in each fraction were analyzed by SDS-PAGE and Coomassie blue staining (left panel) and tested for activity in the GRASP65 bead aggregation assay (right panel).

**Figure S3**

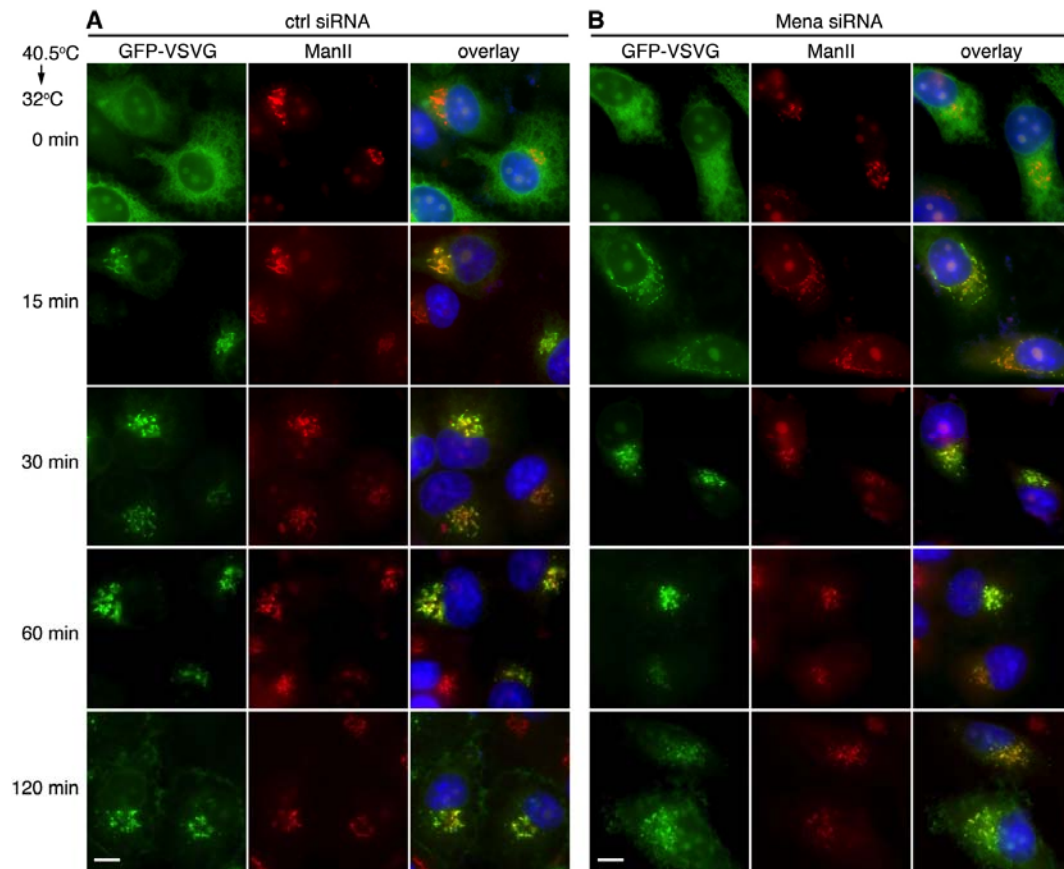

**Figure S3. Mena depletion does not impact VSV-G transport.**

(A, B) HeLa cells transfected with control or Mena siRNA were infected with VSV-G-ts045-GFP virus at 40.5°C for 16 h to accumulate VSV-G in the ER. Cells were then moved to 32°C for indicated times. Cells were fixed and stained for ManII. Bars, 10  $\mu$ m.

**Figure S4**

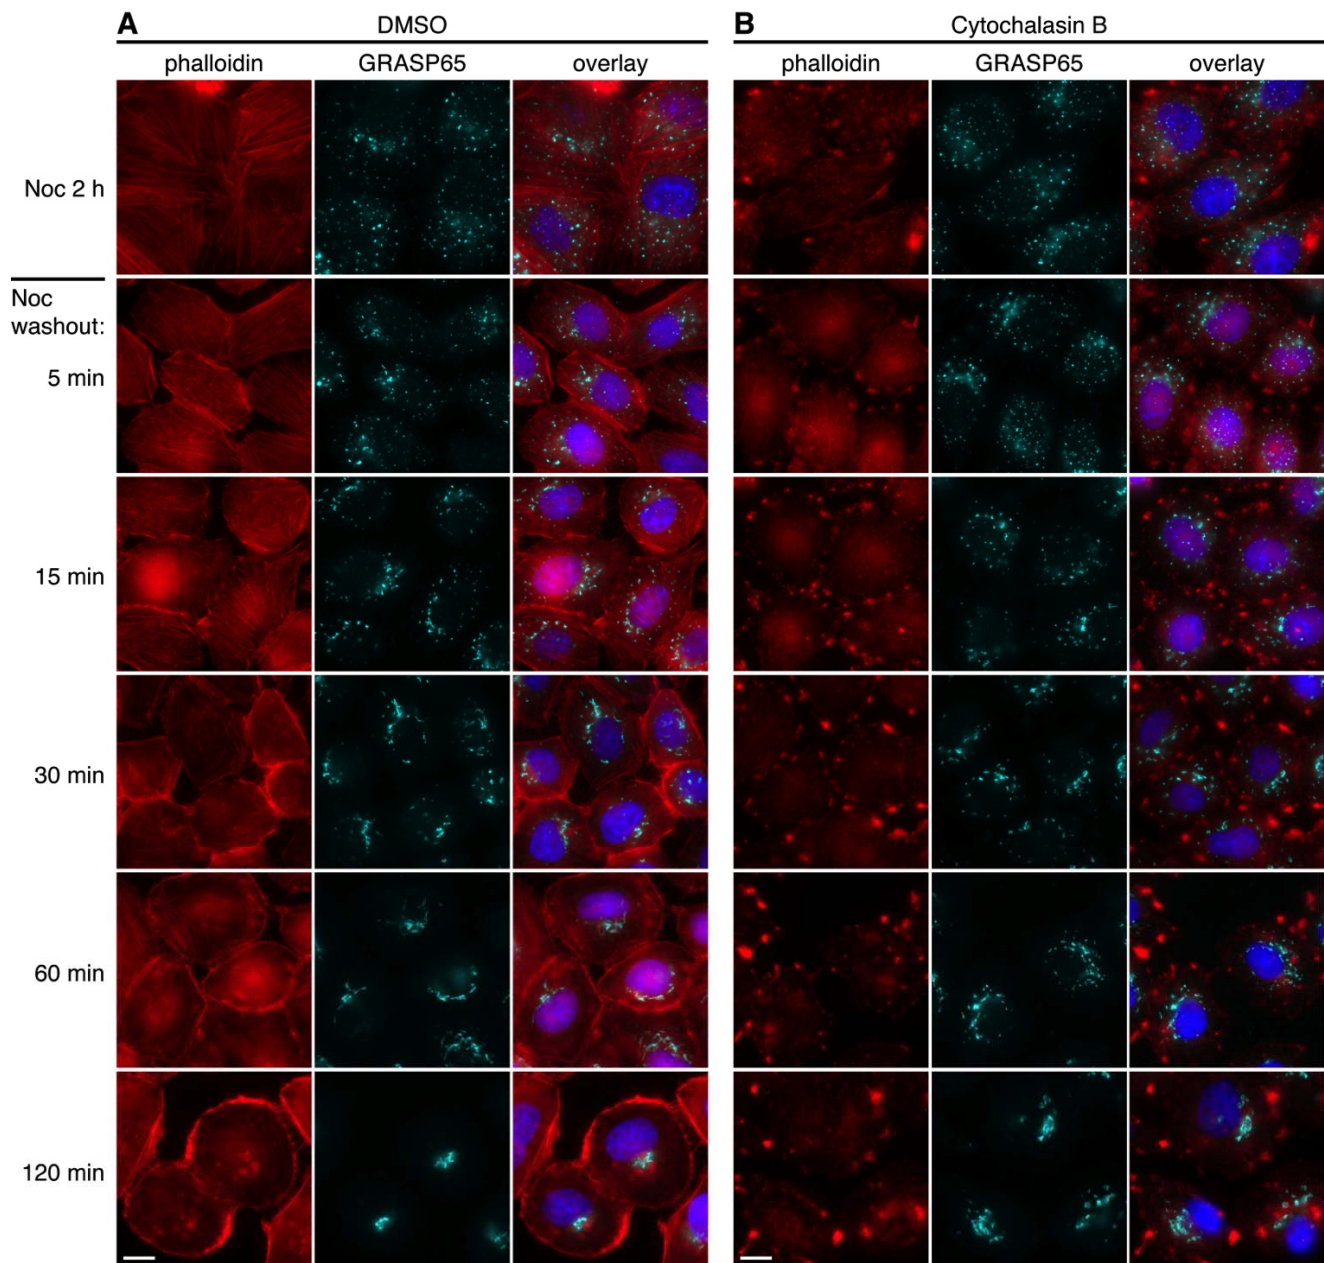

**Figure S4. Depolymerization of F-actin inhibits Golgi reassembly after nocodazole washout.** (A, B) HeLa cells were incubated with nocodazole for 2 h followed by the addition of DMSO or cytochalasin B for another 30 min. For nocodazole washout, cells were washed by PBS and kept in growth medium in the presence of DMSO or cytochalasin B but no nocodazole for the indicated times, fixed and stained by phalloidin and GRASP65 antibodies. Bars, 10  $\mu$ m.

**Figure S5**

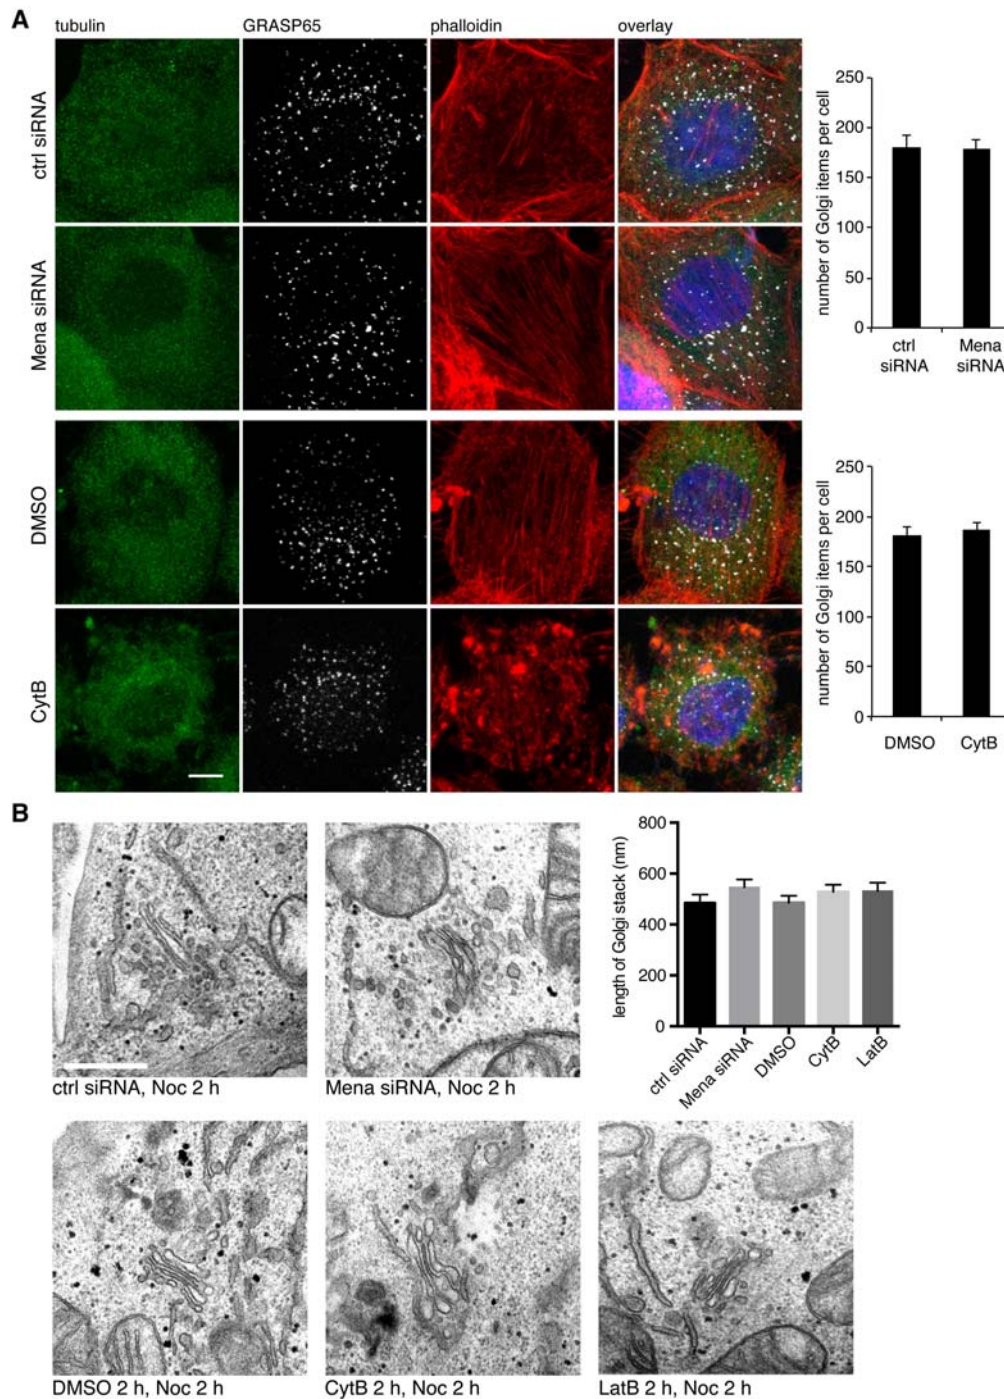

**Figure S5. Actin filaments are required for Golgi ribbon linking but not stacking.**

(A) Cells transfected with indicated siRNA followed with nocodazole treatment for 2 h, or treated with nocodazole together with DMSO or cytochalasin B for 2 h were fixed and stained. The average number of Golgi particles in the cells was quantified. Bar, 10  $\mu$ m. (B) Cells with the indicated combined treatments as in (A) were imaged by EM and quantified. Note that the length of the Golgi stacks in cells had no significant difference between different treatments. Bar, 500 nm.

**Table S1**Protein Name: Gene\_Symbol=**ENAH** 89 kDa protein

Accession No.: IPI00010740

Protein Score: 79

Protein Score C. I. %:99.909

| Calc. Mass | Obsrv. Mass | $\pm$ da | Start Seq. | End Seq. | Sequence                | Modification |
|------------|-------------|----------|------------|----------|-------------------------|--------------|
| 929.4799   | 929.4857    | 0.0058   | 165        | 171      | QLQEQQR                 |              |
| 989.4686   | 989.475     | 0.0064   | 273        | 279      | EQLEWER                 |              |
| 1221.6011  | 1221.6102   | 0.0091   | 23         | 34       | WVPAGGSTGFSR            |              |
| 1329.6757  | 1329.6808   | 0.0051   | 205        | 214      | YNQATQTFHQWR            |              |
| 1579.7401  | 1579.7523   | 0.0122   | 70         | 81       | VHIYHHTGNNTFR           |              |
| 1595.7826  | 1595.788    | 0.0054   | 35         | 47       | STPLSQPSANGVQTEGLDYDR   |              |
| 2235.0525  | 2235.0679   | 0.0154   | 763        | 783      | STPLSQPSANGVQTEGLDYDRLK |              |
| 2476.2314  | 2476.219    | -0.0124  | 763        | 785      | QNSQLPAQVQNGPSQEELEIQR  |              |
| 2493.2329  | 2493.2329   | 0        | 142        | 163      | QNSQLPAQVQNGPSQEELEIQR  |              |

Protein Name: Gene\_Symbol=**PSPHL;ACTG1** Actin, cytoplasmic 2

Accession No.: IPI00021440

Protein Score: 90

Protein Score C. I. %:99.994

| Calc. Mass | Obsrv. Mass | $\pm$ da | Start Seq. | End Seq. | Sequence                       | Modification           |
|------------|-------------|----------|------------|----------|--------------------------------|------------------------|
| 976.4482   | 976.4932    | 0.045    | 19         | 28       | AGFAGDDAPR                     |                        |
| 1132.527   | 1132.575    | 0.048    | 197        | 206      | GYSFTTTAER                     |                        |
| 1198.7054  | 1198.7531   | 0.0477   | 29         | 39       | AVFPSIVGRPR                    |                        |
| 1499.6761  | 1499.7498   | 0.0737   | 360        | 372      | QEYDESGPSIVHR                  | Pyro-glu (N-term Q)[0] |
| 1515.7491  | 1515.7872   | 0.0381   | 85         | 95       | IWHHTFYNELR                    |                        |
| 1516.7026  | 1516.774    | 0.0714   | 360        | 372      | QEYDESGPSIVHR                  |                        |
| 1954.0643  | 1954.1265   | 0.0622   | 96         | 113      | VAPEEHPVLLTEAPLNPK             |                        |
| 2215.0698  | 2215.1379   | 0.0681   | 292        | 312      | DLYANTVLSGGTTMYPGIADR          |                        |
| 2231.0649  | 2231.1433   | 0.0784   | 292        | 312      | DLYANTVLSGGTTMYPGIADR          | Oxidation (M)[14]      |
| 2730.4324  | 2730.377    | -0.0554  | 336        | 359      | KYSWIGGSILASLSTFQQMWISK        |                        |
| 2746.4272  | 2746.375    | -0.0522  | 336        | 359      | KYSWIGGSILASLSTFQQMWISK        | Oxidation (M)[20]      |
| 3183.6143  | 3183.6658   | 0.0515   | 148        | 177      | TTGIVMDSGDGVTHTVPIYEGYALPHAILR |                        |
| 3199.6091  | 3199.6812   | 0.0721   | 148        | 177      | TTGIVMDSGDGVTHTVPIYEGYALPHAILR | Oxidation (M)[6]       |

Protein Name: Gene\_Symbol=**ACTB** Actin, cytoplasmic 2

Accession No.: IPI00848058

Protein Score: 87

Protein Score C. I. %:99.986

| Calc. Mass | Obsrv. Mass | $\pm$ da | Start Seq. | End Seq. | Sequence                       | Modification           |
|------------|-------------|----------|------------|----------|--------------------------------|------------------------|
| 976.4482   | 976.4932    | 0.045    | 48         | 57       | AGFAGDDAPR                     |                        |
| 1132.527   | 1132.575    | 0.048    | 226        | 235      | GYSFTTTAER                     |                        |
| 1198.7054  | 1198.7531   | 0.0477   | 58         | 68       | AVFPSIVGRPR                    |                        |
| 1499.6761  | 1499.7498   | 0.0737   | 389        | 401      | QEYDESGPSIVHR                  | Pyro-glu (N-term Q)[0] |
| 1515.7491  | 1515.7872   | 0.0381   | 114        | 124      | IWHHTFYNELR                    |                        |
| 1516.7026  | 1516.774    | 0.0714   | 389        | 401      | QEYDESGPSIVHR                  |                        |
| 1954.0643  | 1954.1265   | 0.0622   | 125        | 142      | VAPEEHPVLLTEAPLNPK             |                        |
| 2215.0698  | 2215.1379   | 0.0681   | 321        | 341      | DLYANTVLSGGTTMYPGIADR          |                        |
| 2231.0649  | 2231.1433   | 0.0784   | 321        | 341      | DLYANTVLSGGTTMYPGIADR          | Oxidation (M)[14]      |
| 2730.4324  | 2730.377    | -0.0554  | 365        | 388      | KYSWIGGSILASLSTFQQMWISK        |                        |
| 2746.4272  | 2746.375    | -0.0522  | 365        | 388      | KYSWIGGSILASLSTFQQMWISK        | Oxidation (M)[20]      |
| 3183.6143  | 3183.6658   | 0.0515   | 177        | 206      | TTGIVMDSGDGVTHTVPIYEGYALPHAILR |                        |
| 3199.6091  | 3199.6812   | 0.0721   | 177        | 206      | TTGIVMDSGDGVTHTVPIYEGYALPHAILR | Oxidation (M)[6]       |

**Table S1. Identification of Mena and actin as GRASP65-interacting proteins by mass spectrometry.**
